# Supplementary material for: Will right versus left acute colonic diverticulitis location affect the likelihood of emergent operation?
Source: Research Square preprint supplement (doi:10.21203/rs.3.rs-1727904/v1), 2022-06-10
Supplement: Supplementary file 1 [file 03c29d634108394bbf0f99dd.xlsx]

## Sheet: Table 1
Table 1	Characteristics of right- and left-sided diverticulitis
	Right side	Left side
	57	22	p
Age	49.95±16.44	58.59±22.83	0.116
Gender (Male/Female)	24/33	10/12	0.788
WBC	10887.9±3614.39	10347.3±4184.48	0.5703
Hb	13.58±1.819	12.68±2.022	0.0601
CRP	6.977±5.984	9.012±7.598	0.2137
