# Supplementary material for: Will right versus left acute colonic diverticulitis location affect the likelihood of emergent operation?
Source: Research Square preprint supplement (doi:10.21203/rs.3.rs-1727904/v1), 2022-06-10
Supplement: Supplementary file 2 [file 68a045369c8e8df77c4e47ce.xlsx]

## Sheet: Table 2
Table 2		Risk analysis between operation and medical treatment
		Surgery		Medical treatment
		5		74		P
Age		76.6±13.63		50.72±17.89		0.00222
WBC		8928±4674.31		10859.59±3699.41		0.269226
Hb		10.86±1.17		13.50±1.84		0.00226405
CRP		20.768±8.44		6.65±5.32		4.21492e-07
