# Supplementary material for: Will right versus left acute colonic diverticulitis location affect the likelihood of emergent operation?
Source: Research Square preprint supplement (doi:10.21203/rs.3.rs-1727904/v1), 2022-06-10
Supplement: Supplementary file 3 [file d3657e37a5f13313db989d91.xlsx]

## Sheet: Table 4
Table 4	Relationship between operation and extra-luminal air distribution type
		No free air	Local distribution	Extensive distribution
Medical treatment		44	29	1
Emergent operation		0	1	4
